# Supplementary material for: Associations of alcoholic beverage preference with cardiometabolic and lifestyle factors: the NQplus study
Source: PubMed Central journal article supplement — BMJ Open. 2016 Jun 15;6(6):e010437. doi: 10.1136/bmjopen-2015-010437 (PMC4916604; doi:10.1136/bmjopen-2015-010437), 2016-06-15
Supplement: bmjopen-2015-010437supp_table.pdf [file bmjopen-2015-010437supp_table.pdf]

**Supplemental table 1. Grouping of food frequency questionnaire items**

| <b>Food group</b>                 | <b>Included items from food frequency questionnaire</b>                                                                                                                                                           |
|-----------------------------------|-------------------------------------------------------------------------------------------------------------------------------------------------------------------------------------------------------------------|
| <b>Fruit</b>                      | Apple, banana, pear, orange, strawberries, grapes, other types of fruit                                                                                                                                           |
| <b>Vegetables</b>                 | Cauliflower, broccoli, spinach, leak, French beans, carrot, lettuce, tomato, cabbage, raw carrot, other types of vegetables, other types of raw vegetables                                                        |
| <b>Dairy – full-fat</b>           | Full-fat milk, full-fat chocolate milk, mousse, ice cream, whipped cream, coffee cream and milk, coffee creamer and powder, full-fat yoghurt with and without fruit, full-fat custard, cream eaten with warm meal |
| <b>Dairy – semi-fat</b>           | Semi-skimmed milk, semi-skimmed yoghurt with and without fruit, semi-skimmed coffee milk, semi-skimmed chocolate milk                                                                                             |
| <b>Dairy – low-fat</b>            | Low-fat milk, low-fat chocolate milk, buttermilk, low-fat yoghurt with and without fruit, skimmed milk                                                                                                            |
| <b>Potatoes</b>                   | Boiled and mashed potatoes, fried potatoes and mashed potatoes with added fat                                                                                                                                     |
| <b>Pasta and rice – plain</b>     | White pasta, white rice                                                                                                                                                                                           |
| <b>Pasta and rice - wholemeal</b> | Wholemeal pasta, brown rice                                                                                                                                                                                       |
| <b>Cheese – low-fat</b>           | 20+ and 30+ cheese, 40+ cheese                                                                                                                                                                                    |
| <b>Cheese – full-fat</b>          | 48+ cheese, full-fat luxury cheese, semi-fat luxury cheese                                                                                                                                                        |
| <b>Bread – white</b>              | White bread, white rolls, current buns, current and raisin bread, croissants, Dutch rusks, crackers                                                                                                               |
| <b>Bread - wholemeal</b>          | Wholemeal bread, multigrain breads, wheat bread, multigrain bread, muesli buns, wholemeal Dutch rusks and knäckebröd, high fibre / wholemeal knäckebröd, wholemeal bread, rye bread, Dutch spiced honey cake      |
| <b>Cereals</b>                    | Muesli and cruesli, breakfast cereals (cornflakes, smacks, etc.), fibre-rich products, oatmeal, ready-to-drink breakfast drink                                                                                    |
| <b>Eggs</b>                       | Boiled eggs, fried eggs                                                                                                                                                                                           |
| <b>Fish</b>                       | Ready- to-eat fried fish, lean fish, unknown type of fish, fish salad, clams, trout, herring, salmon                                                                                                              |
| <b>Red meat</b>                   | Minced meat, steak, tender steak, pork chops, pork filet, other types of meat such as veal, liver or kidney products                                                                                              |
| <b>Processed meat</b>             | Ham, cold meats and sausage, bacon, unknown type of cold meats, smoked sausage, liver sausage, other type of sausage, boiled liver, liver products                                                                |
| <b>Poultry</b>                    | Chicken and turkey                                                                                                                                                                                                |
| <b>Vegetarian products</b>        | Soy milk, soy dessert, tofu, tahoe, other vegetarian products, unknown type of vegetarian product, vegetarian cold meats, marmite                                                                                 |
| <b>Legumes</b>                    | Legumes                                                                                                                                                                                                           |
| <b>Nuts</b>                       | Peanuts, walnuts, mixed nuts and raisins, other types of nuts, line seed, peanut butter, nuts and seeds eaten with warm meal                                                                                      |
| <b>Cakes and cookies</b>          | Small cookies and biscuits, cake and large cookies, nutritional biscuits, pastry and pies                                                                                                                         |
| <b>Sweets</b>                     | Chocolate sandwich topping, other sweet sandwich topping, water-based ice, sugar added to coffee, tea, yoghurt, etc., chocolate (dark, milk, and white), candybar                                                 |
| <b>Snacks</b>                     | Pizza, pancake, French fries, deep fried savoury snacks (small and large), spring rolls (small and large), crisps / salty snacks, mayonnaise salad snack                                                          |
| <b>Oils and dressings</b>         | Olive oil, oil rich in mono-unsaturated fatty acids, oil rich in poly-                                                                                                                                            |

|                                |                                                                                                                                                                                                           |
|--------------------------------|-----------------------------------------------------------------------------------------------------------------------------------------------------------------------------------------------------------|
|                                | unsaturated fatty acids, dressing with oil and vinegar                                                                                                                                                    |
| <b>Cooking fats</b>            | Butter, semi-skimmed butter, lard, solid frying fat, liquid frying fat, solid deep-frying fats, liquid deep-frying fats, liquid margarine, solid margarine, unknown type of fat used for food preparation |
| <b>Margarine</b>               | Margarine, low-fat margarine, diet margarine, cholesterol-reducing margarine                                                                                                                              |
| <b>Coffee and tea</b>          | Coffee, black tea, green tea, herbal tea                                                                                                                                                                  |
| <b>Non-alcoholic beverages</b> | Alcohol-free beer, soft drink, light soft drinks                                                                                                                                                          |
| <b>Juices</b>                  | Vegetable juices, orange juice, other types of fruit juice                                                                                                                                                |
| <b>Soup</b>                    | Soup with legumes, other soups                                                                                                                                                                            |
| <b>Condiments</b>              | Dressing without oil, dressing with semi-fat mayonnaise, dressing with mayonnaise, mayonnaise, semi-skimmed mayonnaise, ketchup, peanut sauce, tomato sauce, other sauces                                 |
